# Supplementary material for: The impact of ligand chain length on the HER performance of atomically precise Pt6(SR)12 nanoclusters
Source: Royal Society of Chemistry journal article supplement (doi:10.1039/d4nr03316g), 2024-12-03
Supplement: d4nr03316g1.pdf [file d4nr03316g1.pdf]

## Supporting Information

### **The impact of ligand chain length on HER performance of atomically precise Pt<sub>6</sub>(SR)<sub>12</sub> nanoclusters**

Lipipuspa Sahoo<sup>1</sup>, Supriti Dutta<sup>2</sup>, Aarti Devi<sup>1</sup>, Rashi<sup>1</sup>, Swapan K Pati<sup>2</sup> and Amitava Patra\*<sup>1,3</sup>

<sup>1</sup>Institute of Nano Science and Technology, Knowledge City, Sector 81, Mohali 140306, India.

<sup>2</sup>Theoretical Sciences Unit, School of Advanced Materials, Jawaharlal Nehru Centre for Advanced Scientific Research (JNCASR), Bangalore 560064, India.

<sup>3</sup>School of Materials Sciences, Indian Association for the Cultivation of Science, Jadavpur, Kolkata-700032, India

\*Author to whom correspondence should be addressed; E-mail: [msap@iacs.res.in](mailto:msap@iacs.res.in), Phone: (91)-33-2473-4971, Fax: (91)-33-2473-280

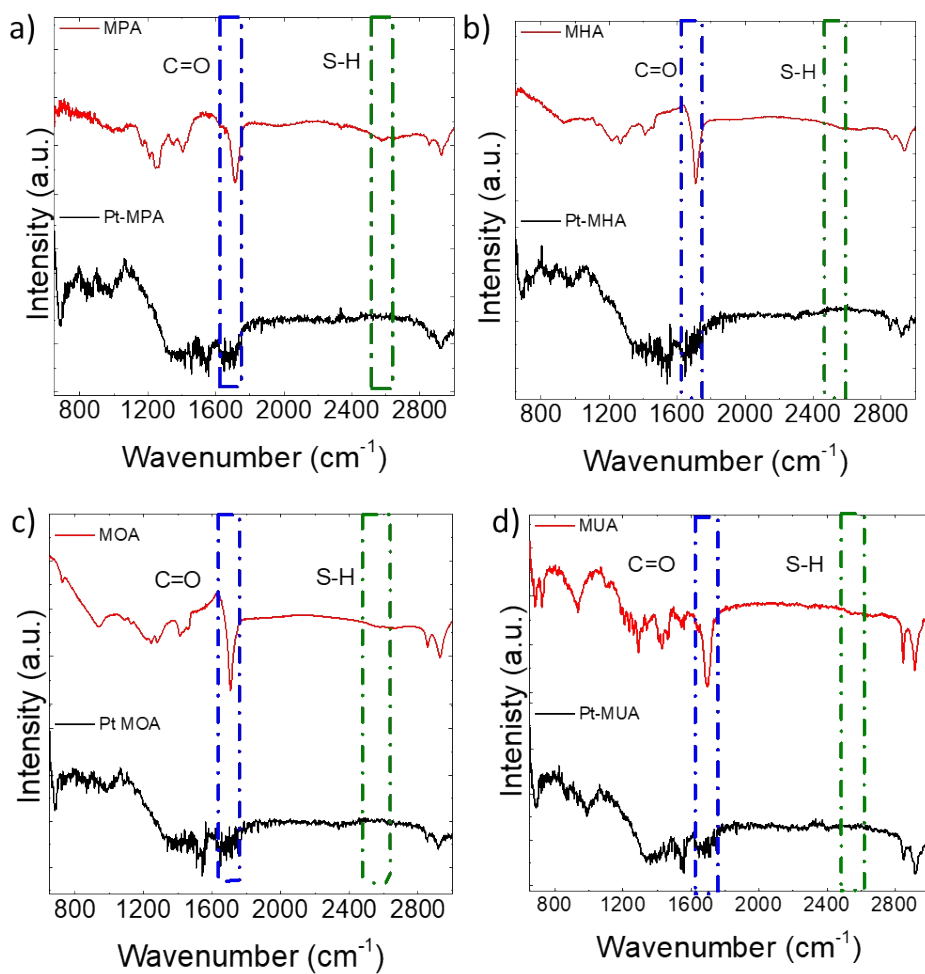

**Fig. 1** FT-IR spectra of a) MPA and Pt<sub>6</sub>(MPA)<sub>12</sub> NCs, (b) MHA and Pt<sub>6</sub>(MHA)<sub>12</sub> NCs, (c) MOA and Pt<sub>6</sub>(MOA)<sub>12</sub> NCs, (d) MUA and Pt<sub>6</sub>(MUA)<sub>12</sub> NCs.

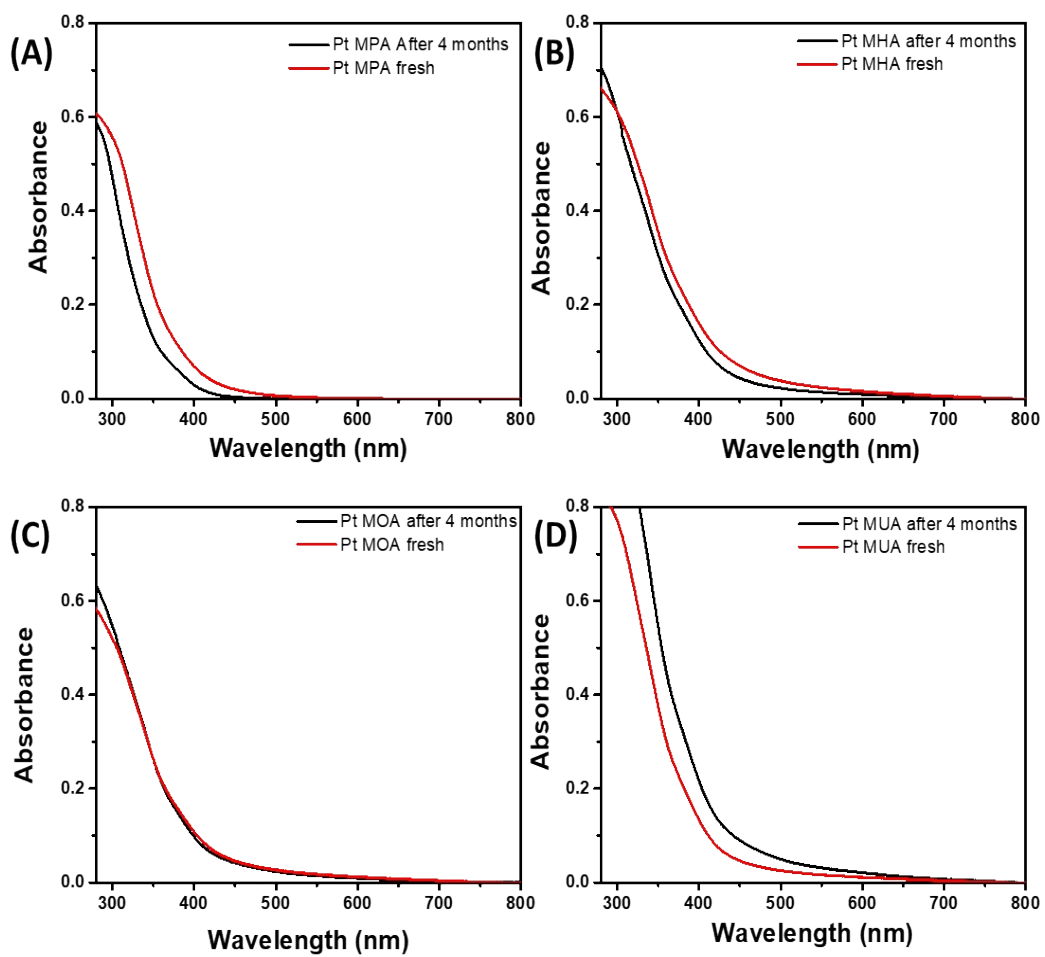

**Fig. S2** UV-Vis spectra of as-prepared Pt NCs were recorded after fresh synthesis and after four months.

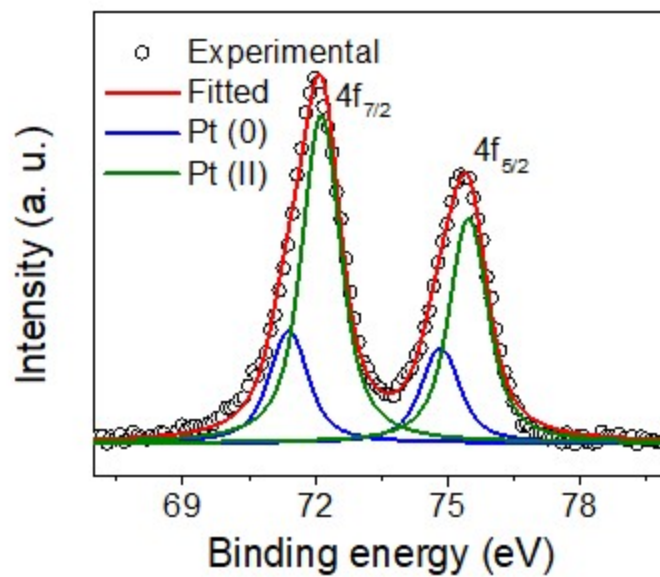

**Fig. S3** The deconvolution of Pt 4f XPS spectrum of Pt<sub>6</sub>(MPA)<sub>12</sub> NCs.

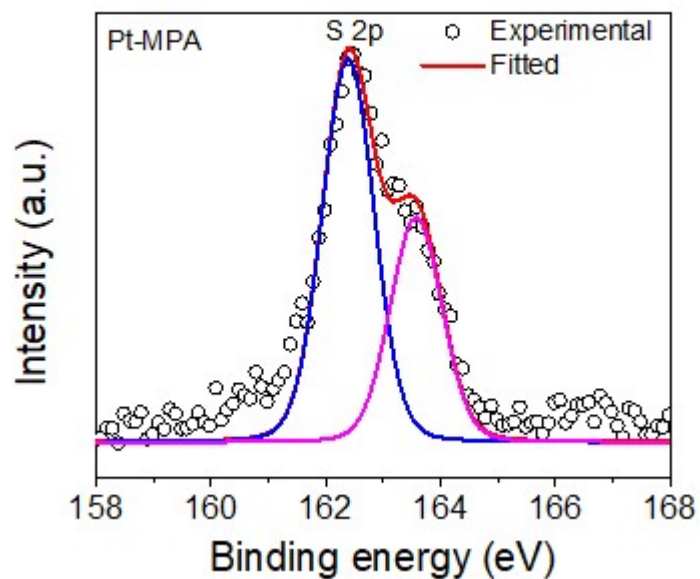

**Fig. S4** The deconvolution of S 2p XPS spectrum of Pt<sub>6</sub>(MPA)<sub>12</sub> NCs.

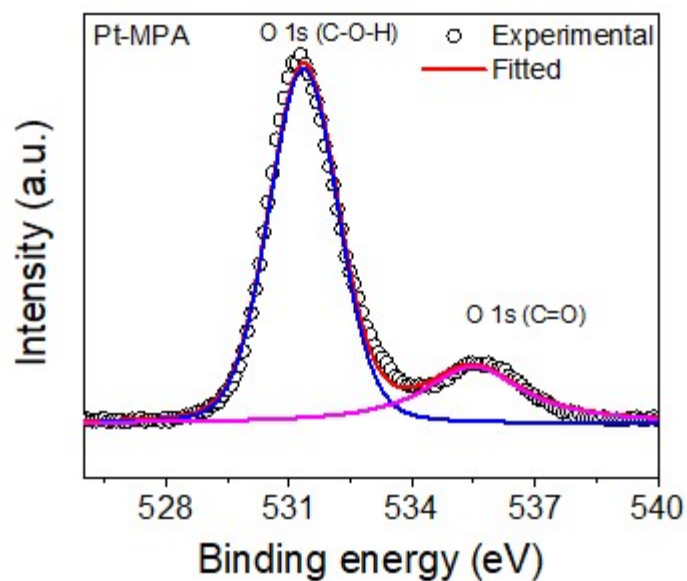

**Fig. S5** The deconvolution of O 1s XPS spectrum of  $\text{Pt}_6(\text{MPA})_{12}$  NCs.

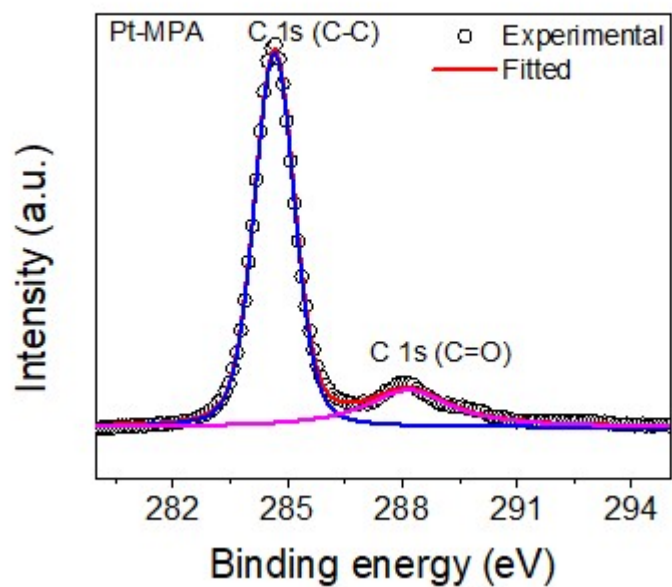

**Fig. S6** The deconvolution of C1s XPS spectrum of Pt<sub>6</sub>(MPA)<sub>12</sub> NCs.

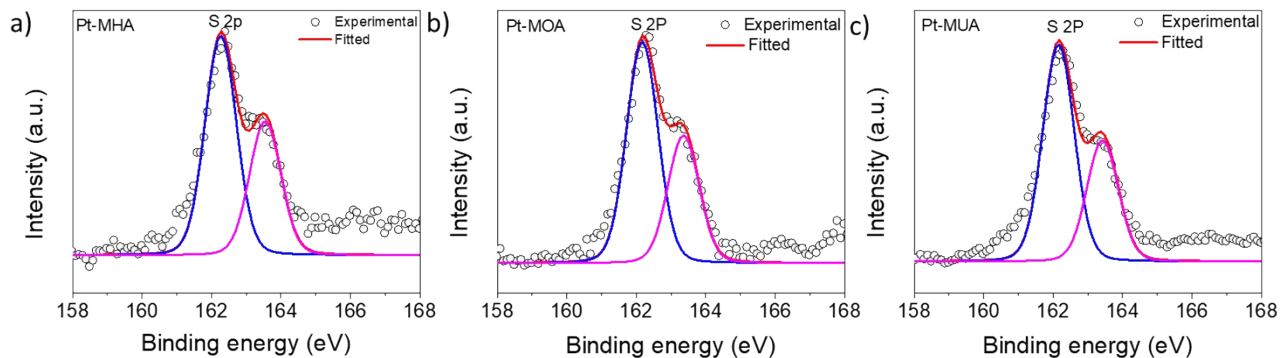

**Fig. S7** The deconvolution of S 2p XPS spectrum of (a) Pt<sub>6</sub>(MHA)<sub>12</sub> NCs, (b) Pt<sub>6</sub>(MOA)<sub>12</sub> NCs, (c) Pt<sub>6</sub>(MUA)<sub>12</sub> NCs.

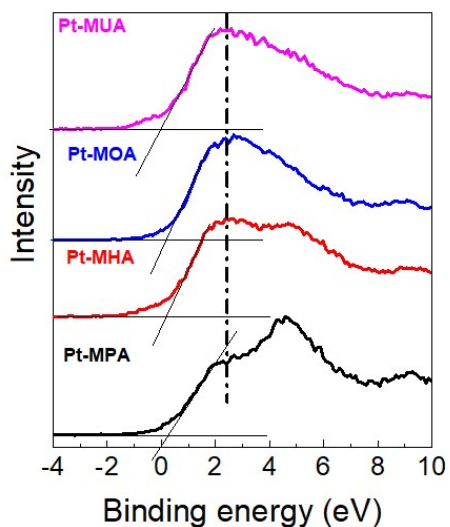

**Fig. S8** Valence band spectra of Pt<sub>6</sub>(MPA)<sub>12</sub> NCs, Pt<sub>6</sub>(MHA)<sub>12</sub> NCs, Pt<sub>6</sub>(MOA)<sub>12</sub> NCs, and Pt<sub>6</sub>(MUA)<sub>12</sub> NCs depicting the method to locate VBM.

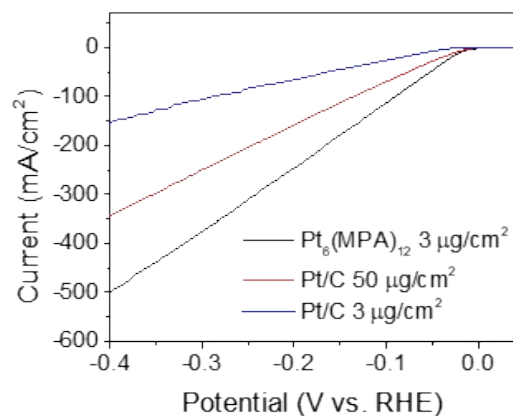

**Fig. S9** HER polarization curve of Pt<sub>6</sub>(MPA)<sub>12</sub> NCs and commercial Pt/C at different mass loading.

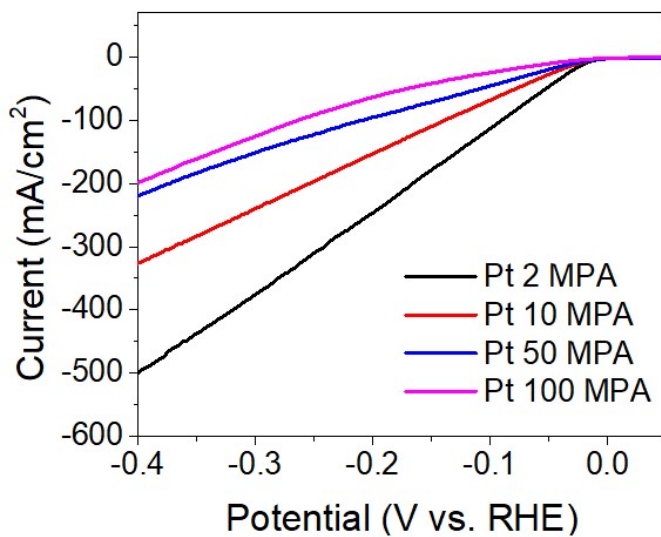

**Fig. S10** HER polarization curves of Pt NCs synthesized using 2, 10, 50, and 100 μl of MPA ligand.

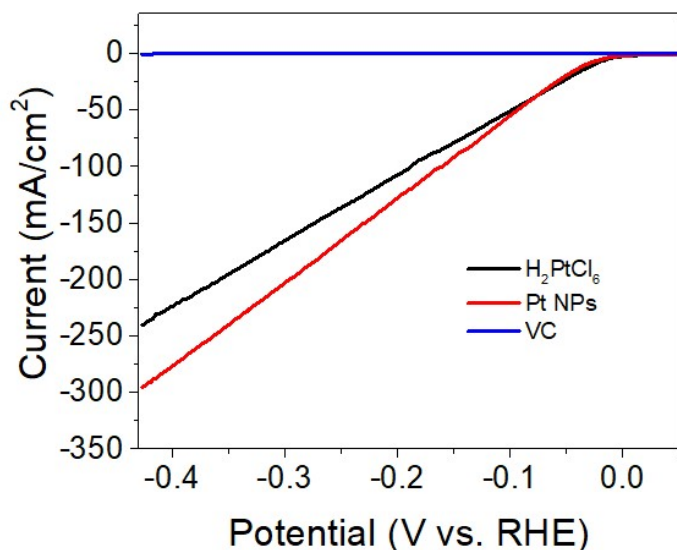

**Fig. S11** HER polarization curves of Pt samples synthesized without MPA ligand (Pt NPs) and using only H<sub>2</sub>PtCl<sub>6</sub> on Vulcan carbon (Pt content kept same).

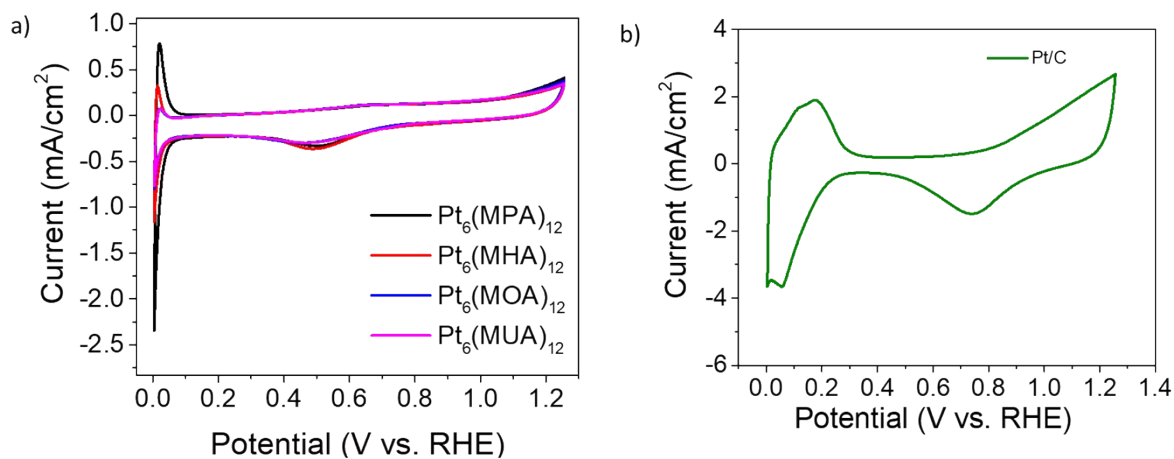

**Fig. S12** Cyclic voltammograms of (a) Pt<sub>6</sub>(SR)<sub>12</sub> NCs (b) Pt/C recorded in Ar saturated 0.5 M H<sub>2</sub>SO<sub>4</sub> at a sweep rate of 50 mV/s.



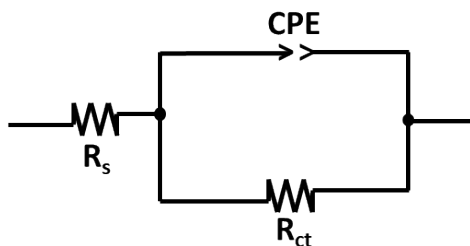

**Fig. S13** Standard Randel's equivalent circuit is used to fit the Nyquist plot.

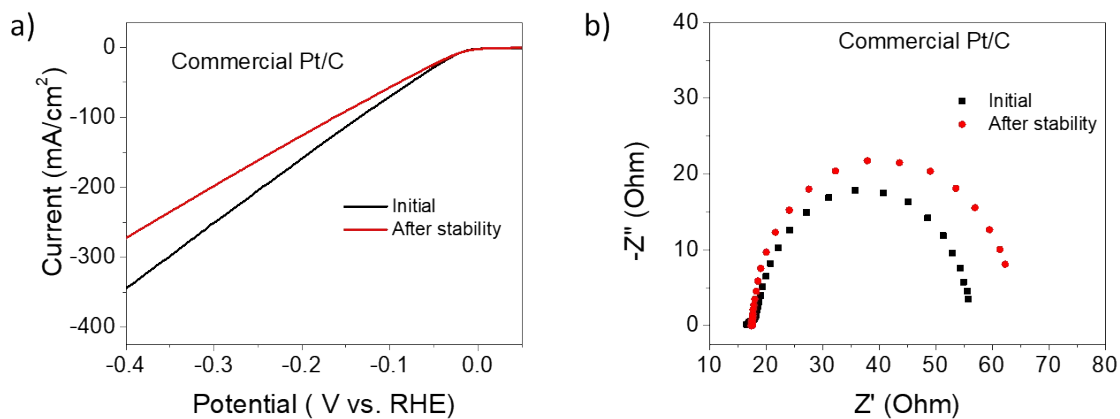

**Fig. S14** (a) HER polarization curve of Pt/C was recorded before and after the catalysis, and (b) Nyquist plot of Pt/C was recorded before and after the catalysis.

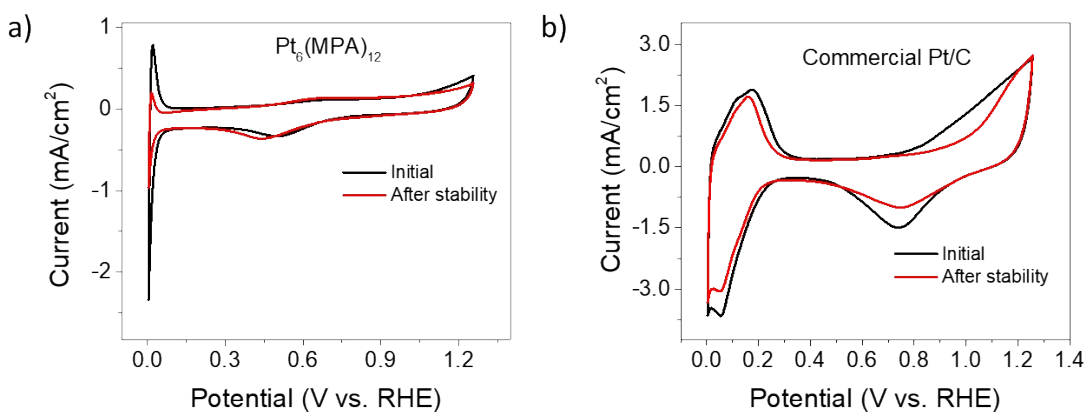

**Fig. S15** Cyclic voltammograms of (a)  $\text{Pt}_6(\text{MPA})_{12}$  NCs recorded before and after the catalysis, (b) Pt/C recorded before and after the catalysis.

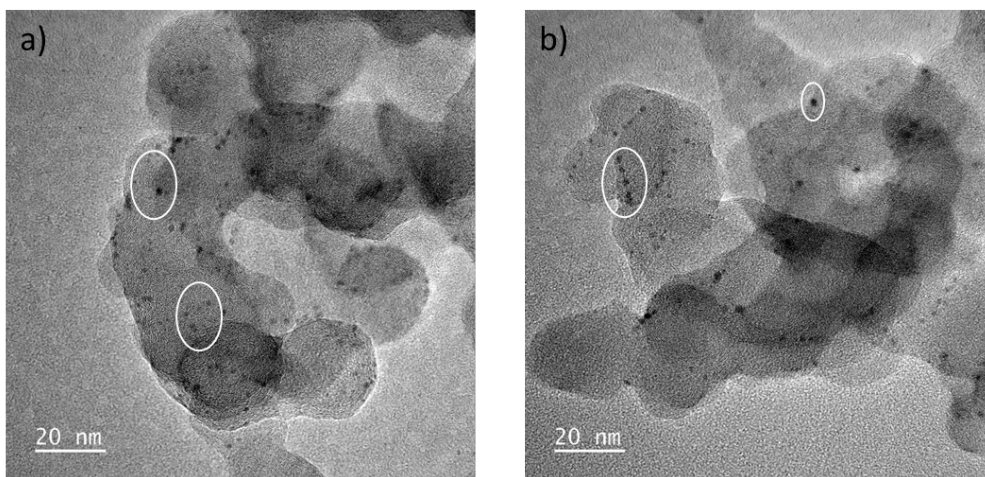

**Fig. S16** TEM images of  $\text{Pt}_6(\text{MPA})_{12}$  NCs were recorded after the catalysis. The highlighted region shows that the  $\text{Pt}_6(\text{MPA})_{12}$  NCs remains strongly intact with the Vulcan Carbon after catalysis.

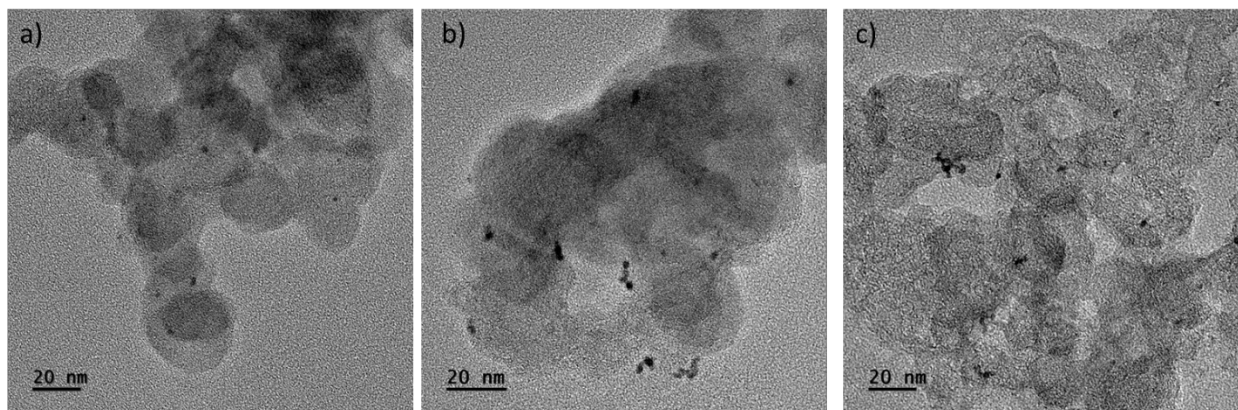

**Fig. S17** TEM images of a)  $\text{Pt}_6(\text{MHA})_{12}$ , b)  $\text{Pt}_6(\text{MOA})_{12}$ , b)  $\text{Pt}_6(\text{MUA})_{12}$  recorded after catalysis.

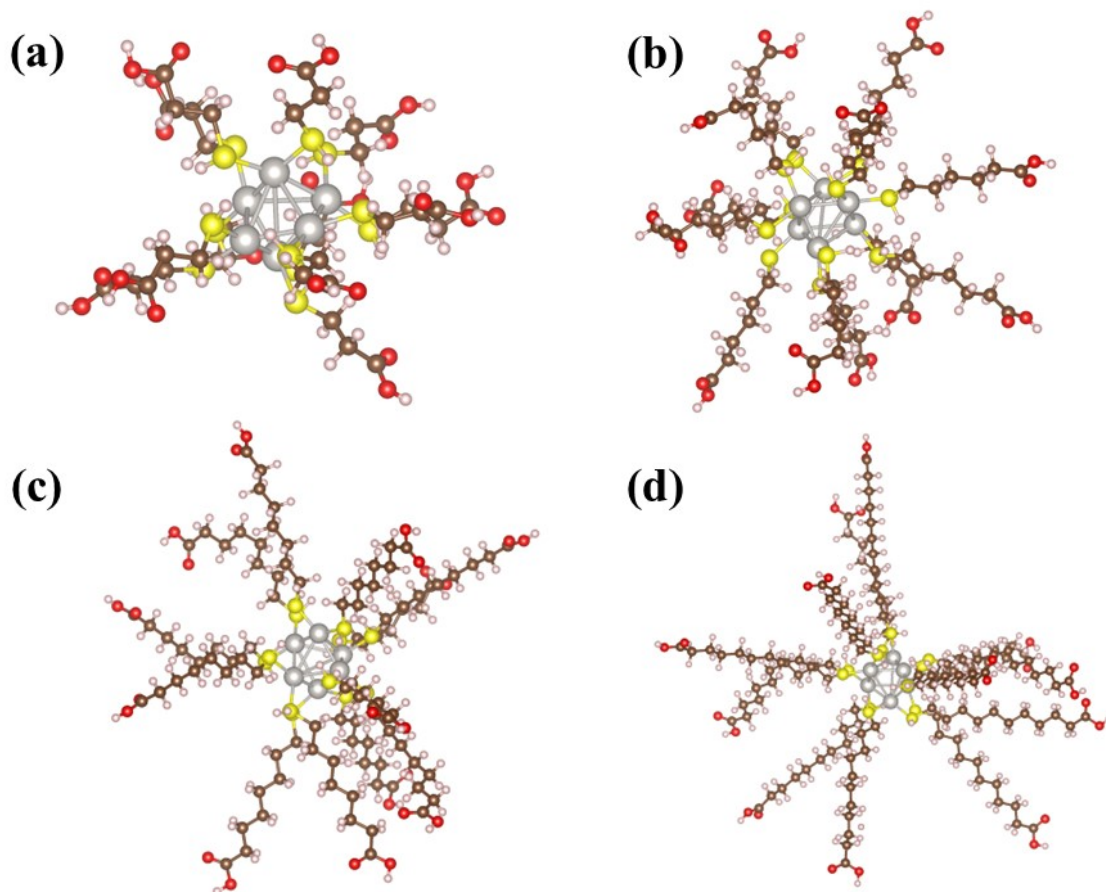

**Fig. S18** The optimized geometries of the catalysts (a) Pt<sub>6</sub>(MPA)<sub>12</sub> NCs, (b) Pt<sub>6</sub>(MHA)<sub>12</sub> NCs, (c) Pt<sub>6</sub>(MOA)<sub>12</sub> NCs, (d) Pt<sub>6</sub>(MUA)<sub>12</sub> NCs. The grey, yellow, brown, red, and white balls represent Pt, S, C, O, and H atoms, respectively.

**Table S1.** Comparison of electrocatalytic HER performance of the Pt<sub>6</sub>(MPA)<sub>12</sub> with other Pt-based *state-of-the-art* electrocatalysts developed recently.

| Catalyst                                                         | Electrolyte                          | Pt loading amount ( $\mu\text{g}/\text{cm}^2$ ) | Overpotential at 10 mA/cm <sup>2</sup> (mV) | Tafel slope (mV/dec) | Reference |
|------------------------------------------------------------------|--------------------------------------|-------------------------------------------------|---------------------------------------------|----------------------|-----------|
| Pt <sub>6</sub> (MPA) <sub>12</sub>                              | 0.5 M H <sub>2</sub> SO <sub>4</sub> | 2.55                                            | 19                                          | 30                   | This work |
| Pt <sub>5</sub> /HMCS                                            | 0.5 M H <sub>2</sub> SO <sub>4</sub> | 7.6                                             | 20.7                                        | 28.3                 | 1         |
| Pt <sub>1</sub> /Mesoporous C                                    | 0.5 M H <sub>2</sub> SO <sub>4</sub> | 10                                              | 26                                          | NA                   | 2         |
| Pt <sub>1</sub> /OLC                                             | 0.5 M H <sub>2</sub> SO <sub>4</sub> | 1.4                                             | 38                                          | 36                   | 3         |
| Mo <sub>2</sub> TiC <sub>2</sub><br>Tx-PtSA                      | 0.5 M H <sub>2</sub> SO <sub>4</sub> | 12                                              | 30                                          | 30                   | 4         |
| Pt-SAs/WS <sub>2</sub>                                           | 0.5 M H <sub>2</sub> SO <sub>4</sub> | 10                                              | 32                                          | 28                   | 5         |
| Pt <sub>1</sub> /N-C                                             | 0.5 M H <sub>2</sub> SO <sub>4</sub> | 6.25                                            | 19                                          | 14.2                 | 6         |
| Pt <sub>1</sub> O <sub>1</sub> /Ti <sub>1-x</sub> O <sub>2</sub> | 0.5 M H <sub>2</sub> SO <sub>4</sub> | 1.27                                            | 22.2                                        | 31                   | 7         |

|                                         |                                         |      |      |      |    |
|-----------------------------------------|-----------------------------------------|------|------|------|----|
| Pt-Ni ASs                               | 0.5 M<br>H <sub>2</sub> SO <sub>4</sub> | 17   | 27.7 | 27   | 8  |
| Pt <sub>3</sub> Co@NCNT                 | 0.5 M<br>H <sub>2</sub> SO <sub>4</sub> | 100  | 42   | 27.2 | 9  |
| Pt-SA/ML-WO <sub>3</sub>                | 0.5 M<br>H <sub>2</sub> SO <sub>4</sub> | 1.1  | 22   | 27   | 10 |
| EG-Pt/<br>CoP-1.5                       | 0.5 M<br>H <sub>2</sub> SO <sub>4</sub> | 1.53 | 21   | 42.5 | 11 |
| Pt-PVP/<br>TNR@GC                       | 0.5 M<br>H <sub>2</sub> SO <sub>4</sub> | 21.8 | 21   | 27   | 12 |
| Pt1/NMHCS                               | 0.5 M<br>H <sub>2</sub> SO <sub>4</sub> | 6.55 | 41   | 56   | 13 |
| PtW NPs/C                               | 0.5 M<br>H <sub>2</sub> SO <sub>4</sub> | 20.8 | 19.4 | 27.8 | 14 |
| PtW <sub>6</sub> O <sub>24</sub> /C     | 0.5 M<br>H <sub>2</sub> SO <sub>4</sub> | NA   | 22   | 29.8 | 15 |
| Pt SASs/AG                              | 0.5 M<br>H <sub>2</sub> SO <sub>4</sub> | 31.1 | 12   | 29   | 16 |
| Pt/NGNs                                 | 0.5 M<br>H <sub>2</sub> SO <sub>4</sub> | 1.6  | 38   | 29   | 17 |
| Pt <sub>3</sub> Ni <sub>2</sub> NWS-S/C | 0.5 M<br>H <sub>2</sub> SO <sub>4</sub> | 15.3 | 28   | NA   | 18 |

|                                       |                                         |       |    |      |    |
|---------------------------------------|-----------------------------------------|-------|----|------|----|
| Pt@DNA-GC                             | 0.5 M<br>H <sub>2</sub> SO <sub>4</sub> | 15    | 26 | 30   | 19 |
| Pt1/MC                                | 0.5 M<br>H <sub>2</sub> SO <sub>4</sub> | 10    | 25 | 26   | 20 |
| Pt1/NPC                               | 0.5 M<br>H <sub>2</sub> SO <sub>4</sub> | 3.8   | 25 | 28   | 21 |
| Pt1/NMC                               | 0.5 M<br>H <sub>2</sub> SO <sub>4</sub> | 10    | 29 | 26   | 22 |
| PtCoFe@CN                             | 0.5 M<br>H <sub>2</sub> SO <sub>4</sub> | 13.11 | 45 | 32   | 23 |
| 400-SWNT/Pt                           | 0.5 M<br>H <sub>2</sub> SO <sub>4</sub> | 19.4  | 27 | 38   | 24 |
| 200-SWNT/Pt                           | 0.5 M<br>H <sub>2</sub> SO <sub>4</sub> | 5.6   | 40 | 38   | 24 |
| Pt-MoS <sub>2</sub>                   | 0.5 M<br>H <sub>2</sub> SO <sub>4</sub> | 7.28  | 38 | 25   | 25 |
| Ti-based<br>SAL/SAB Pt                | 0.5 M<br>H <sub>2</sub> SO <sub>4</sub> | 4.5   | 19 | 25.9 | 26 |
| ALD50Pt/NGNs                          | 0.5 M<br>H <sub>2</sub> SO <sub>4</sub> | 1.6   | 39 | 29   | 17 |
| Pt/NiS@Al <sub>2</sub> O <sub>3</sub> | 0.5 M<br>H <sub>2</sub> SO <sub>4</sub> | 16    | 34 | 35   | 27 |

|                         |                                         |         |     |    |    |
|-------------------------|-----------------------------------------|---------|-----|----|----|
| Pt-Au <sub>25</sub> NCs | 0.1 M<br>H <sub>2</sub> SO <sub>4</sub> | 0.8     | 117 | 86 | 28 |
| Pt NCs/rgo              | 0.5 M<br>H <sub>2</sub> SO <sub>4</sub> | 0.8 wt% | 67  | 46 | 29 |

---

## References

- 1 X.-K. Wan, H. Bin Wu, B. Y. Guan, D. Luan and X. W. (David) Lou, *Adv. Mater.*, 2020, **32**, 1901349.
- 2 J. Dendooven, R. K. Ramachandran, E. Solano, M. Kurttepli, L. Geerts, G. Heremans, J. Rongé, M. M. Minjauw, T. Dobbelaere, K. Devloo-Casier, J. A. Martens, A. Vantomme, S. Bals, G. Portale, A. Coati and C. Detavernier, *Nat. Commun.*, 2017, **8**, 1074.
- 3 D. Liu, X. Li, S. Chen, H. Yan, C. Wang, C. Wu, Y. A. Haleem, S. Duan, J. Lu, B. Ge, P. M. Ajayan, Y. Luo, J. Jiang and L. Song, *Nat. Energy*, 2019, **4**, 512–518.
- 4 J. Zhang, Y. Zhao, X. Guo, C. Chen, C.-L. Dong, R.-S. Liu, C.-P. Han, Y. Li, Y. Gogotsi and G. Wang, *Nat. Catal.*, 2018, **1**, 985–992.
- 5 Y. Shi, Z.-R. Ma, Y.-Y. Xiao, Y.-C. Yin, W.-M. Huang, Z.-C. Huang, Y.-Z. Zheng, F.-Y. Mu, R. Huang, G.-Y. Shi, Y.-Y. Sun, X.-H. Xia and W. Chen, *Nat. Commun.*, 2021, **12**, 3021.
- 6 S. Fang, X. Zhu, X. Liu, J. Gu, W. Liu, D. Wang, W. Zhang, Y. Lin, J. Lu, S. Wei, Y. Li and T. Yao, *Nat. Commun.*, 2020, **11**, 1029.
- 7 F. Lu, D. Yi, S. Liu, F. Zhan, B. Zhou, L. Gu, D. Golberg, X. Wang and J. Yao, *Angew. Chemie Int. Ed.*, 2020, **59**, 17712–17718.
- 8 Z. Zhang, G. Liu, X. Cui, B. Chen, Y. Zhu, Y. Gong, F. Saleem, S. Xi, Y. Du, A. Borgna, Z. Lai, Q. Zhang, B. Li, Y. Zong, Y. Han, L. Gu and H. Zhang, *Adv. Mater.*, 2018, **30**, 1801741.
- 9 S. L. Zhang, X. F. Lu, Z.-P. Wu, D. Luan and X. W. (David) Lou, *Angew. Chemie Int.*



- Ed.*, 2021, **60**, 19068–19073.
- 10 D. Wang, H. Li, N. Du and W. Hou, *Adv. Funct. Mater.*, 2021, **31**, 2009770.
  - 11 J. Li, H.-X. Liu, W. Gou, M. Zhang, Z. Xia, S. Zhang, C.-R. Chang, Y. Ma and Y. Qu, *Energy Environ. Sci.*, 2019, **12**, 2298–2304.
  - 12 C. Li, Z. Chen, H. Yi, Y. Cao, L. Du, Y. Hu, F. Kong, R. Kramer Campen, Y. Gao, C. Du, G. Yin, I. Y. Zhang and Y. Tong, *Angew. Chemie Int. Ed.*, 2020, **59**, 15902–15907.
  - 13 P. Kuang, Y. Wang, B. Zhu, F. Xia, C.-W. Tung, J. Wu, H. M. Chen and J. Yu, *Adv. Mater.*, 2021, **33**, 2008599.
  - 14 D. Kobayashi, H. Kobayashi, D. Wu, S. Okazoe, K. Kusada, T. Yamamoto, T. Toriyama, S. Matsumura, S. Kawaguchi, Y. Kubota, S. M. Aspera, H. Nakanishi, S. Arai and H. Kitagawa, *J. Am. Chem. Soc.*, 2020, **142**, 17250–17254.
  - 15 F.-Y. Yu, Z.-L. Lang, L.-Y. Yin, K. Feng, Y.-J. Xia, H.-Q. Tan, H.-T. Zhu, J. Zhong, Z.-H. Kang and Y.-G. Li, *Nat. Commun.*, 2020, **11**, 490.
  - 16 S. Ye, F. Luo, Q. Zhang, P. Zhang, T. Xu, Q. Wang, D. He, L. Guo, Y. Zhang, C. He, X. Ouyang, M. Gu, J. Liu and X. Sun, *Energy Environ. Sci.*, 2019, **12**, 1000–1007.
  - 17 N. Cheng, S. Stambula, D. Wang, M. N. Banis, J. Liu, A. Riese, B. Xiao, R. Li, T.-K. Sham, L.-M. Liu, G. A. Botton and X. Sun, *Nat. Commun.*, 2016, **7**, 13638.
  - 18 P. Wang, X. Zhang, J. Zhang, S. Wan, S. Guo, G. Lu, J. Yao and X. Huang, *Nat. Commun.*, 2017, **8**, 14580.
  - 19 S. Anantharaj, P. E. Karthik, B. Subramanian and S. Kundu, *ACS Catal.*, 2016, **6**, 4660–4672.
  - 20 H. Wei, K. Huang, D. Wang, R. Zhang, B. Ge, J. Ma, B. Wen, S. Zhang, Q. Li, M. Lei, C. Zhang, J. Irawan, L.-M. Liu and H. Wu, *Nat. Commun.*, 2017, **8**, 1490.
  - 21 T. Li, J. Liu, Y. Song and F. Wang, *ACS Catal.*, 2018, **8**, 8450–8458.
  - 22 Y.-S. Meng, O. Sato and T. Liu, *Angew. Chemie Int. Ed.*, 2018, **57**, 12216–12226.
  - 23 J. Chen, Y. Yang, J. Su, P. Jiang, G. Xia and Q. Chen, *ACS Appl. Mater. Interfaces*, 2017,

- 9, 3596–3601.
- 24 M. Tavakkoli, N. Holmberg, R. Kronberg, H. Jiang, J. Sainio, E. I. Kauppinen, T. Kallio and K. Laasonen, *ACS Catal.*, 2017, **7**, 3121–3130.
- 25 Z. Chen, K. Leng, X. Zhao, S. Malkhandi, W. Tang, B. Tian, L. Dong, L. Zheng, M. Lin, B. S. Yeo and K. P. Loh, *Nat. Commun.*, 2017, **8**, 14548.
- 26 C. Zhang, Z. Xu, N. Han, Y. Tian, T. Kallio, C. Yu and L. Jiang, *Sci. Adv.*, 2024, **9**, eadd6978.
- 27 Y. Feng, Y. Guan, H. Zhang, Z. Huang, J. Li, Z. Jiang, X. Gu and Y. Wang, *J. Mater. Chem. A*, 2018, **6**, 11783–11789.
- 28 P. Mymoona, J. V Rival, Nonappa, E. S. Shibu and C. Jeyabharathi, *Small*, 2024, **20**, 2308610.
- 29 Z. Zhuang, C. Du, P. Li, Z. Zhang, Z. Fang, J. Guo and W. Chen, *Electrochim. Acta*, 2021, **368**, 137608.
